# Supplementary material for: The effect of cerium alteration on the photocatalytic performance of WO3 in sunlight exposure for water decontamination
Source: Royal Society of Chemistry journal article supplement (doi:10.1039/c5ra22002e), 2015-12-22
Supplement: c5ra22002e1.pdf [file c5ra22002e1.pdf]

# The effect of cerium alteration on the photocatalytic performance of WO<sub>3</sub> in sunlight exposure for water decontamination

M. Aslam<sup>1</sup>, M. Tariq Qamar<sup>1,2</sup>, M. Tahir Soomro<sup>1</sup>, Iqbal M. I. Ismail<sup>1,2</sup>, Z. A. Rehan<sup>2,3</sup>, M. Waqar Ashraf<sup>4</sup>, A. Hameed<sup>1, 5\*</sup>

<sup>1</sup>Centre of Excellence in Environmental Studies (CEES), King Abdulaziz University, Jeddah 21589, Kingdom of Saudi Arabia.

<sup>2</sup>Chemistry Department, Faculty of Science, King Abdulaziz University, P.O. Box 80203, Jeddah 21589, Kingdom of Saudi Arabia.

<sup>3</sup>Centre of Excellence in Desalination Technology (CEDT), King Abdulaziz University, Jeddah 21589, Kingdom of Saudi Arabia.

<sup>4</sup>Department of Mathematics & Natural Sciences, Prince Mohammad Bin Fahd University, Al Khobar 31952, Saudi Arabia

<sup>5</sup>National Centre for Physics, Quaid-e-Azam University, Islamabad 44000, Pakistan.

**\*Corresponding Author:**

**Abdul Hameed, PhD**

Centre of Excellence in Environmental Studies (CEES),  
King Abdulaziz University, Jeddah 21589, Kingdom of Saudi Arabia  
afmuhammad@kau.edu.sa, hameedch@yahoo.com

## Electronic Supplementary Information

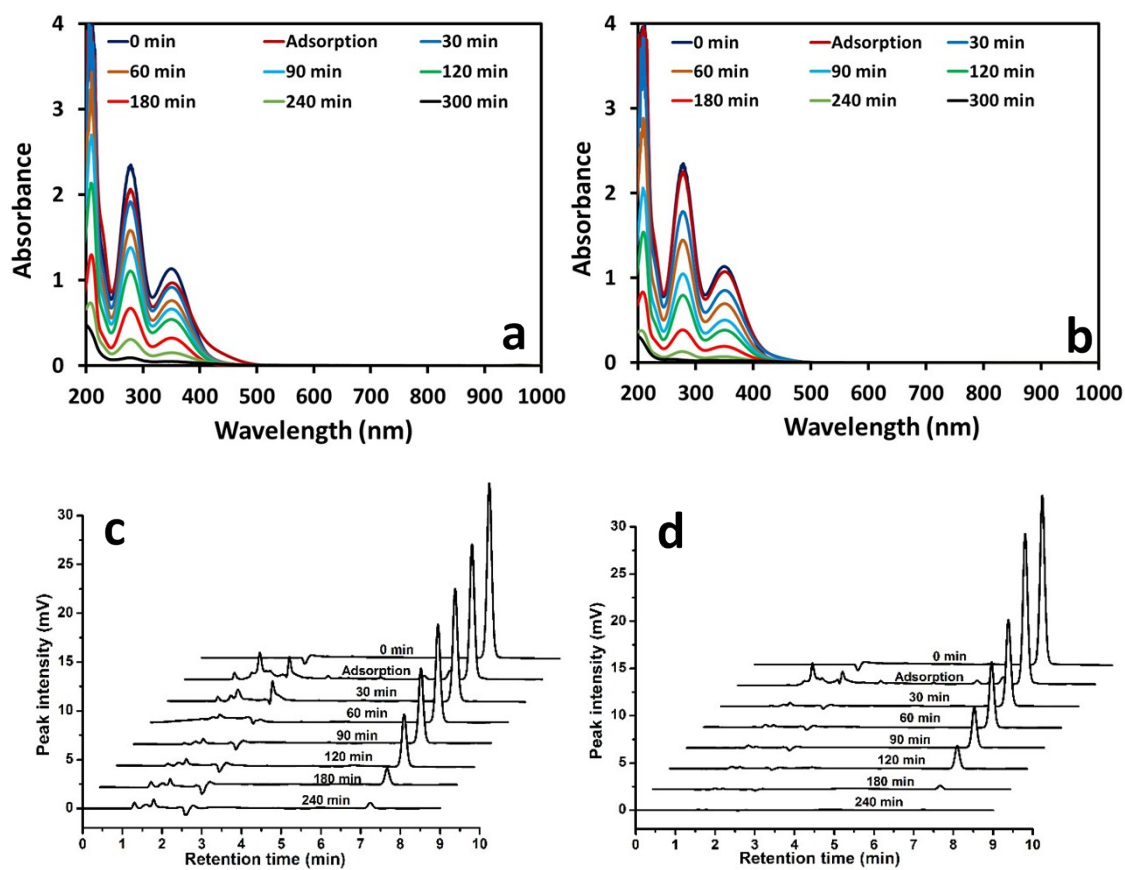

**Fig. S1.** The comparison of the UV-visible degradation profiles of 2-NP over pure and 20% Ce<sup>3+</sup> impregnated WO<sub>3</sub> are presented in (a) and (b), whereas that of HPLC degradation profiles of 2-CP on the same catalysts in sunlight exposure are presented in (c) and (d).

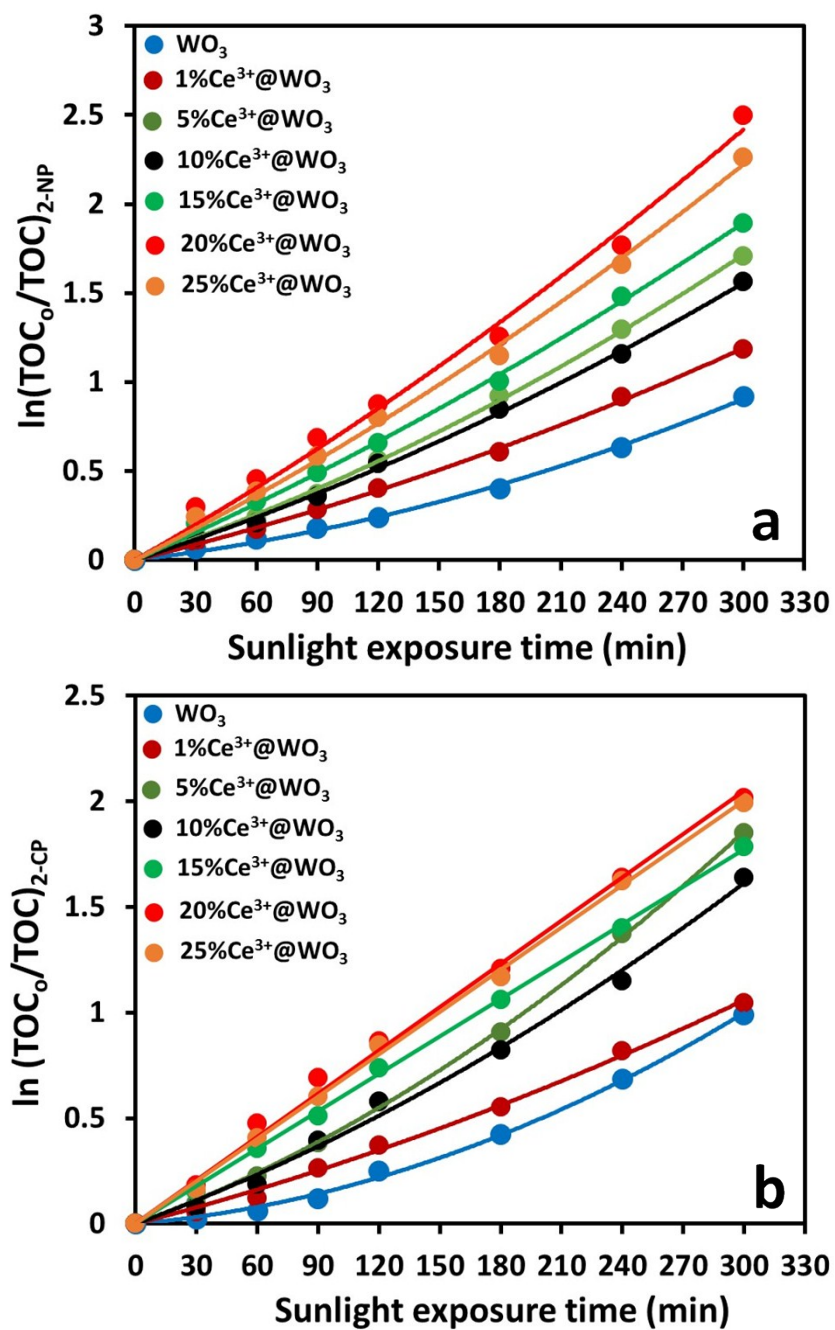

**Fig. S2.** The graphical evaluation of the rates of mineralization of 2-NP (a) and 2-CP (b) in sunlight exposure over pure WO<sub>3</sub>, 1%, 5%, 10%, 15%, 20% and 25% Ce<sup>3+</sup> impregnated WO<sub>3</sub>.

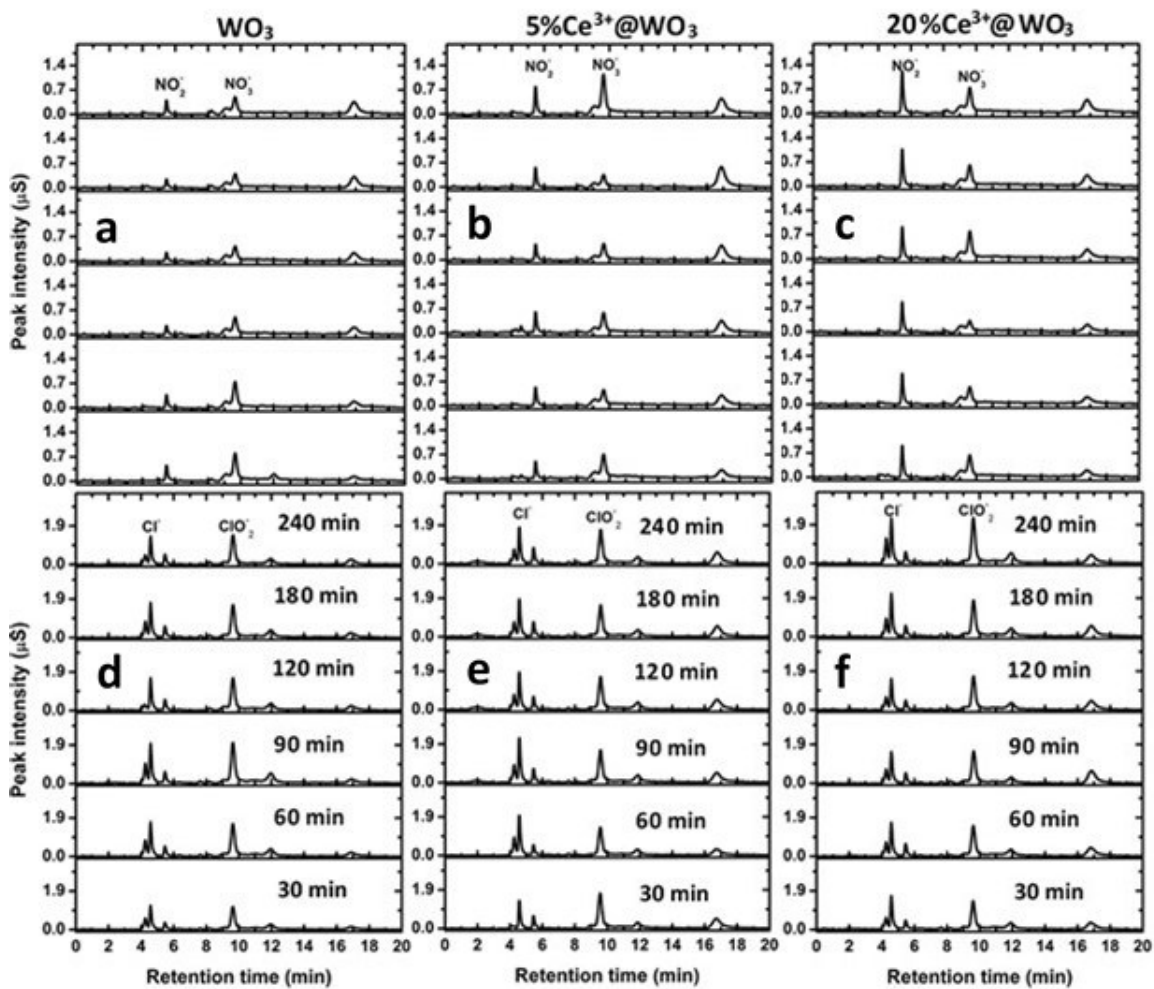

**Fig. S3.** The comparison of the IC profiles for the release of ions during the degradation of 2-NP (a, b, c) and 2-CP (d, e, f) in the presence of pure  $\text{WO}_3$ , 5% and 20%  $\text{Ce}^{3+}$  impregnated  $\text{WO}_3$ .
